# Supplementary material for: Pulse-shaped two-photon excitation of a fluorescent base analogue approaches single-molecule sensitivity
Source: Royal Society of Chemistry journal article supplement (doi:10.1039/c8cp05496g), 2018-01-01
Supplement: c8cp05496g1.pdf [file c8cp05496g1.pdf]

## Electronic supplementary information for

### **Pulse-shaped two-photon excitation of a fluorescent base analogue approaches single-molecule sensitivity**

Rachel S. Fisher, David Nobis, Anders F. Föchtbauer, Mattias Bood, Morten Grøtli, L. Marcus Wilhelmsson, Anita C. Jones\* and Steven W. Magennis\*

\*Correspondence to Prof. Anita Jones (a.c.jones@ed.ac.uk) or Dr. Steven Magennis (steven.magennis@glasgow.ac.uk)

#### **This PDF includes:**

Supplementary Methods  
Supplementary Figures S1-S14  
Supplementary Tables S1-S4  
References

## SUPPLEMENTARY METHODS

### Two-photon cross section calculations

Three two-photon cross section standards were utilised: rhodamine 6G in methanol, coumarin 153 in DMSO and coumarin 153 in toluene. These standard have been studied previously across a wide range of excitation wavelengths.<sup>1</sup>

2P cross-sections ( $\sigma_2$ ) were calculated by comparison to a reference:

$$\frac{\sigma_2^S \phi^S}{\sigma_2^R \phi^R} = \frac{\eta^R n^S C^R F^S \langle P^R \rangle^2}{\eta^S n^R C^S F^R \langle P^S \rangle^2} \quad (\text{Equation 1})$$

where  $\phi$  is the quantum yield of fluorescence,  $\eta$  is a term that accounts for the wavelength-dependent collection efficiency of the fluorescence,  $n$  is the refractive index of the solvent,  $C$  is the concentration,  $F$  is the integrated fluorescence signal from the recorded spectrum,  $P$  is the excitation power, and the superscripts  $S$  and  $R$  refer to either the sample or reference.

Equation 1 can be rewritten as Equation 2:

$$\sigma_2^S = \frac{\alpha \sigma_2^R \phi^R n^S C^R}{\phi^S n^R C^S} \frac{F^S \langle P^R \rangle^2}{F^R \langle P^S \rangle^2} \quad (\text{Equation 2})$$

where  $\alpha = \frac{\eta^R}{\eta^S}$  is the correction factor for the wavelength-dependence of the detector and the second term is calculated from the slopes of the plots of integrated emission intensity ( $F$ ) against power squared ( $\langle P \rangle^2$ ) for sample and reference.

## SUPPLEMENTARY FIGURES

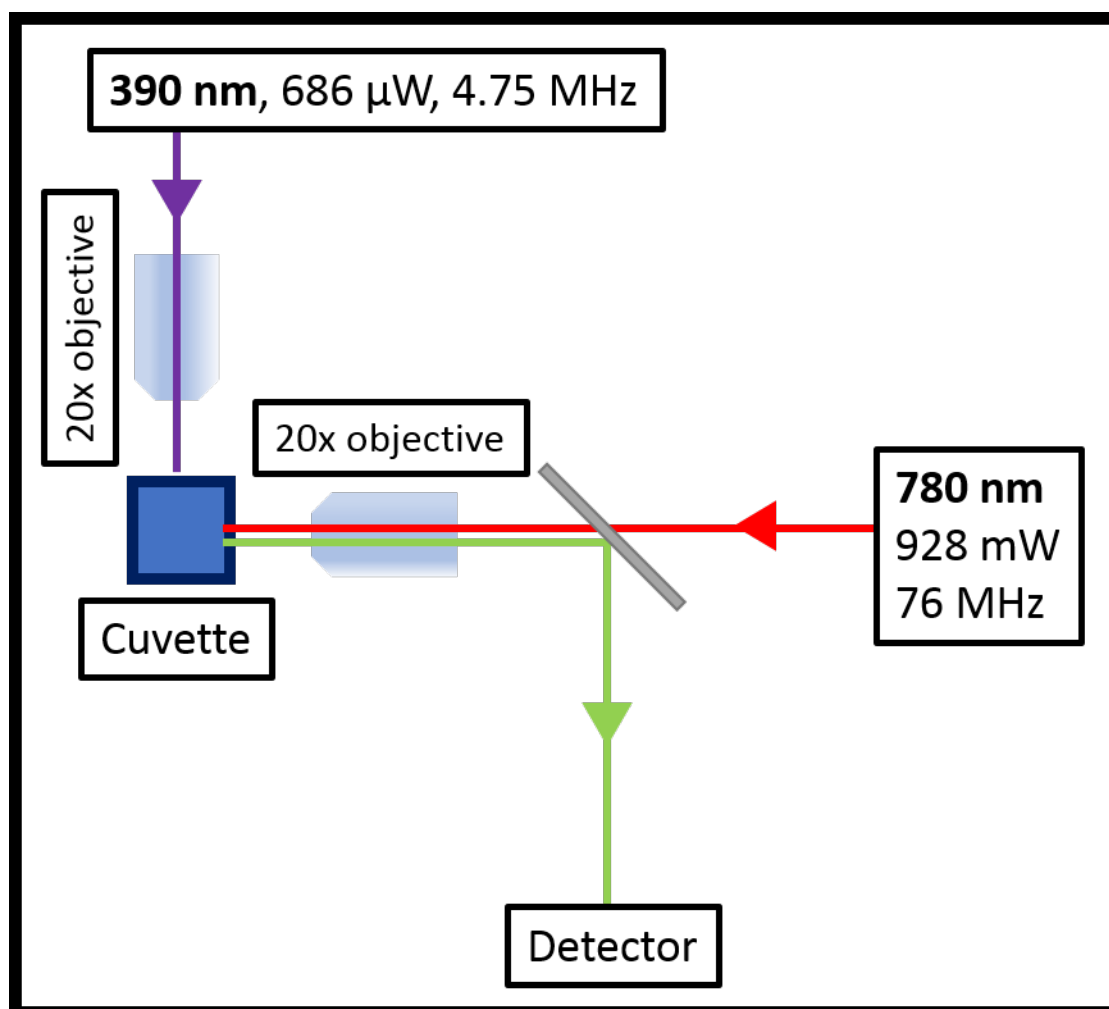

Figure S1. Schematic of experimental setup used for ensemble 2P spectroscopy and for comparison of 1P vs 2P photobleaching.

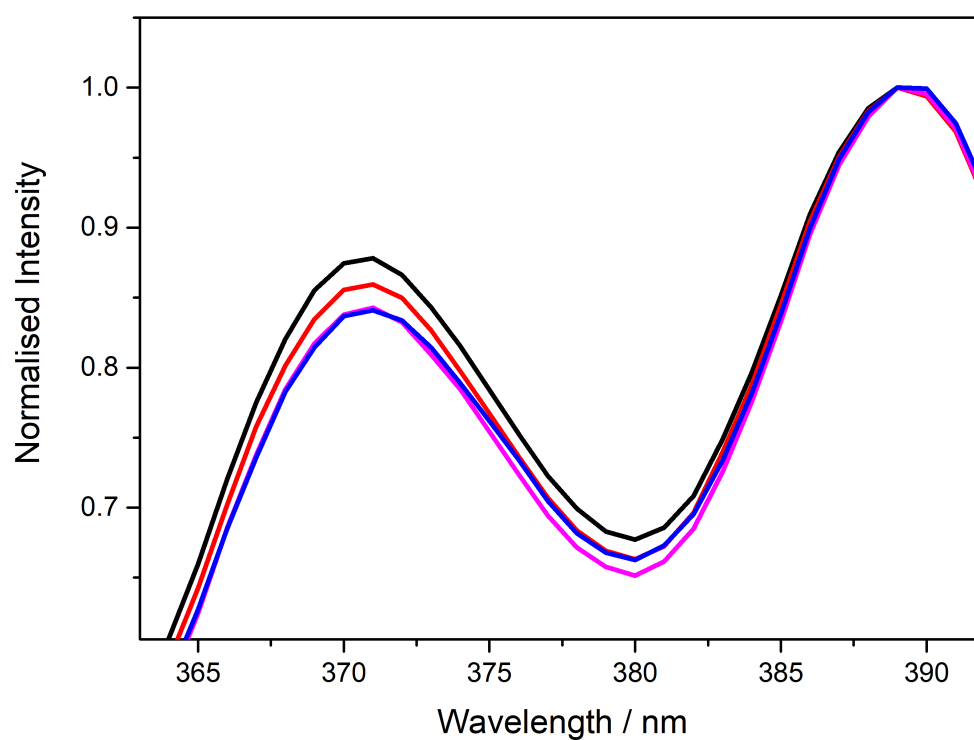

**Figure S2.** Normalized excitation spectra of pA riboside in ethanol, recorded at emission wavelengths of 420 nm (black), 440 nm (red), 460 nm (pink) and 480 nm (blue).

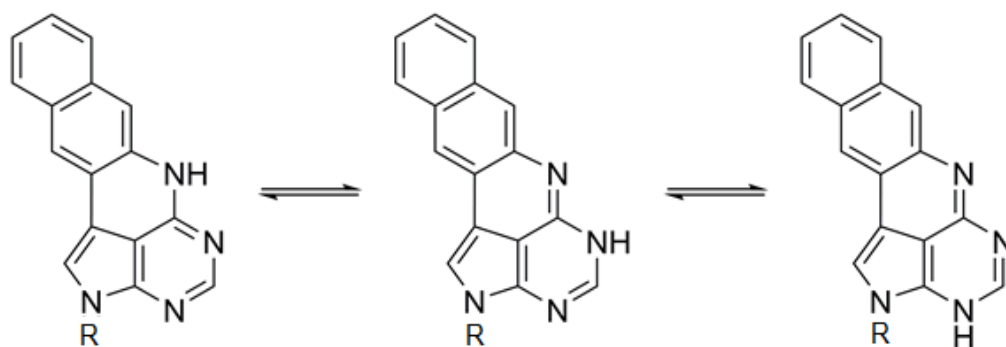

**Figure S3.** Structures of possible tautomeric forms of pA

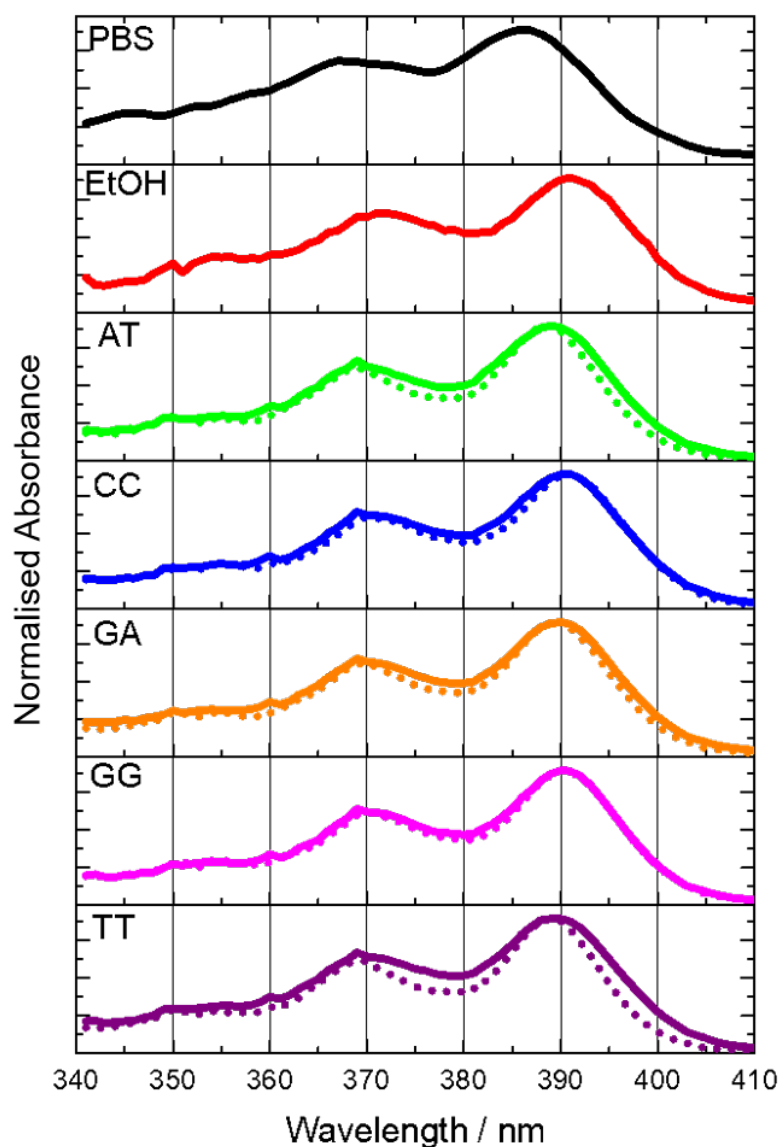

**Figure S4.** Absorption spectra of pA riboside in phosphate buffer at pH 7.5 (black) or ethanol (red) and pA-containing oligonucleotides with different combinations of nearest neighbours. AT (green), CC (blue), GA (cyan), GG (pink) and TT (purple). Solid line denotes single-strands and dotted line denotes double strands. In oligonucleotides CC, GA and GG, the absorption spectra of single and double strands are essentially identical. For AT and TT, a slight narrowing of the absorption bands is seen in the duplex.

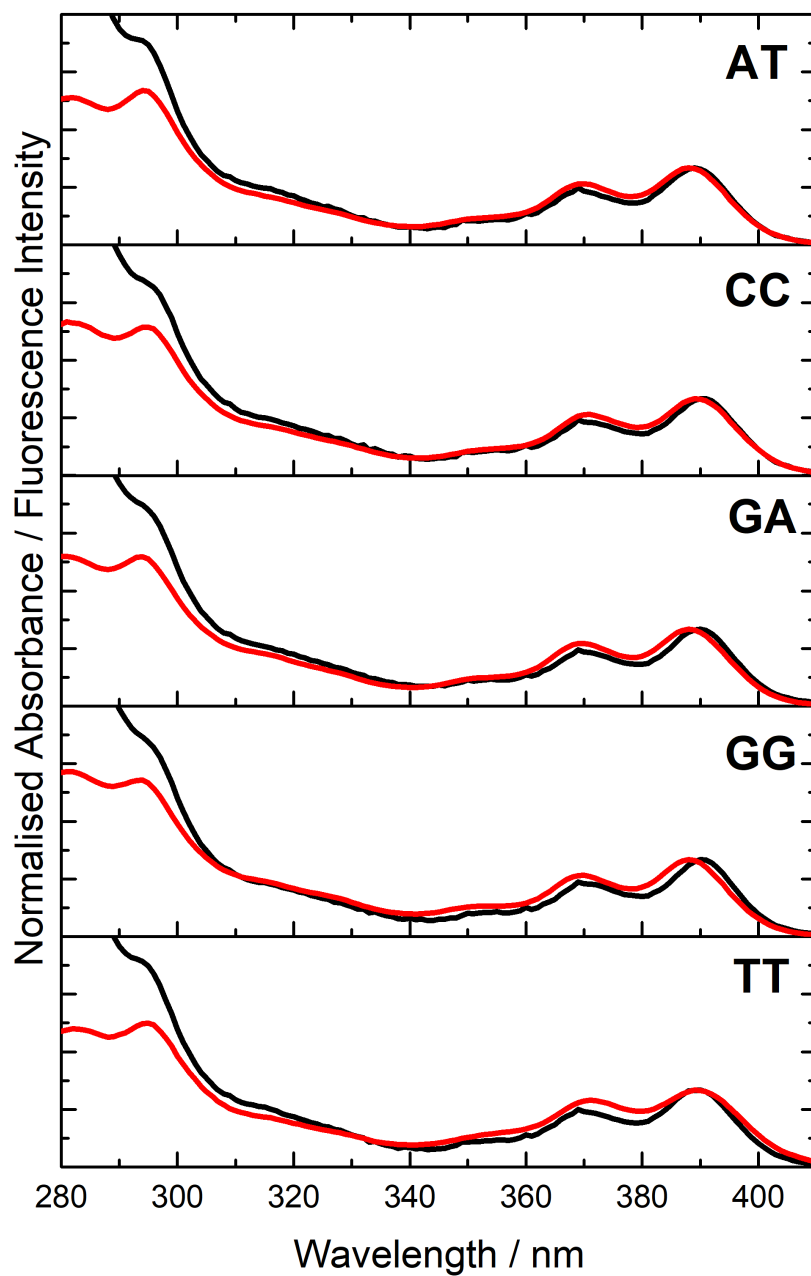

**Figure S5.** Comparison of excitation spectra (red), at emission wavelength 420 nm, and absorption spectra (black) of pA in single-stranded oligonucleotides with different combinations of nearest neighbours. Differences between absorption and excitation spectra below 310 nm are due to absorption by the natural bases.

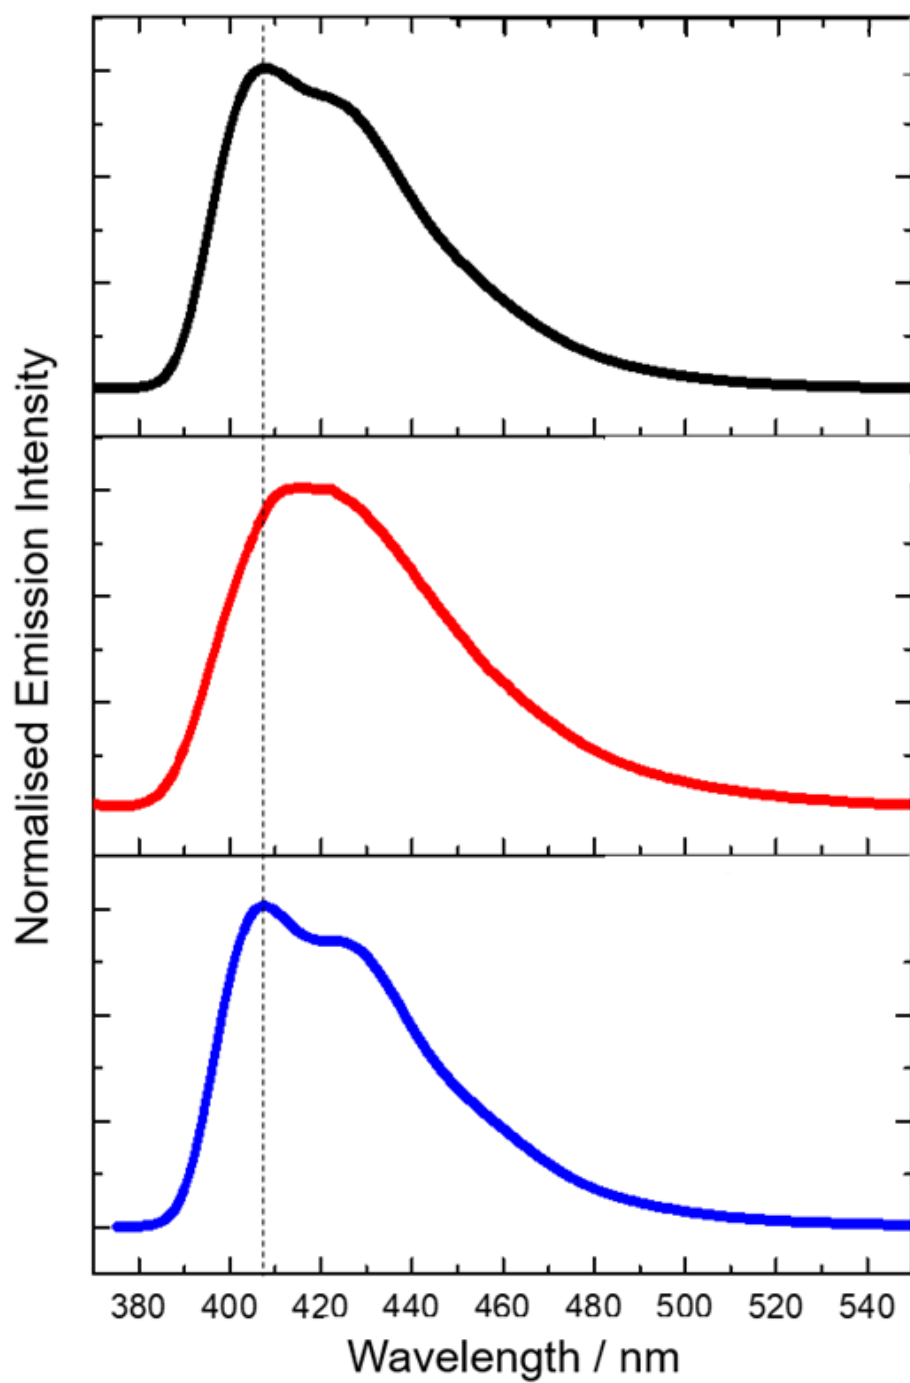

**Figure S6.** Normalized emission spectra of pA-containing single-stranded oligonucleotide GA, (top, black), and of pA as the free riboside in phosphate buffer at pH 7.5 (middle, red) and in ethanol (bottom, blue).

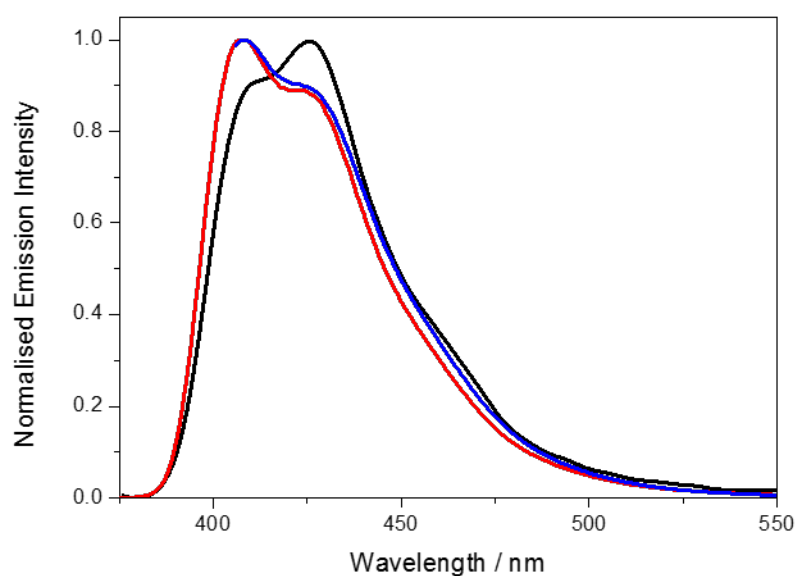

**Figure S7.** Normalized emission spectra of pA nucleobase in ethanol following 2P excitation at 780 nm (black), 1P excitation at 360 nm (red) and 1P excitation at 390 nm (blue)

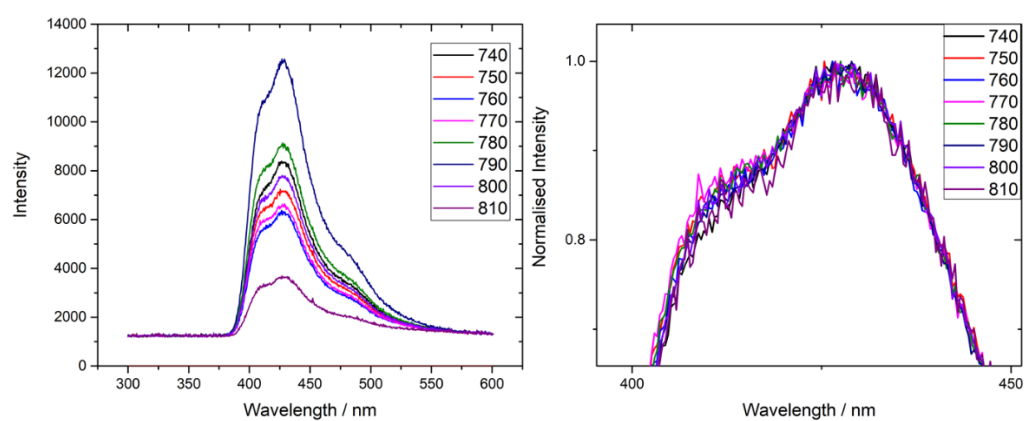

**Figure S8.** Emission spectra (left) and normalized emission spectra (right) for pA nucleobase in ethanol recorded at two-photon excitation wavelengths between 740 nm and 810 nm.



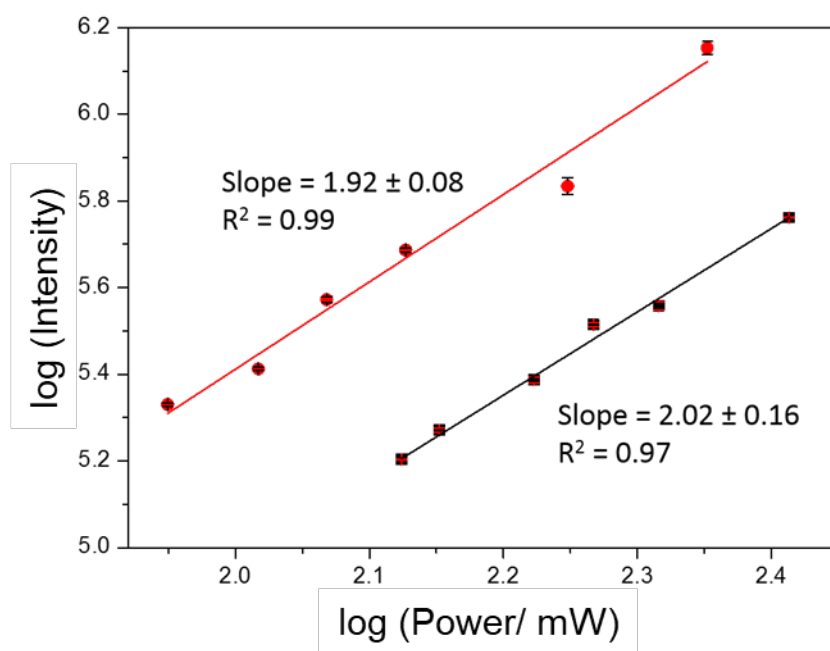

**Figure S9.** Log-log plot of fluorescence intensity vs. laser power for pA-containing GA oligonucleotides: single stranded (red), double stranded (black). Excitation wavelength was 780 nm. Laser power was varied from 90 mW to 300 mW.

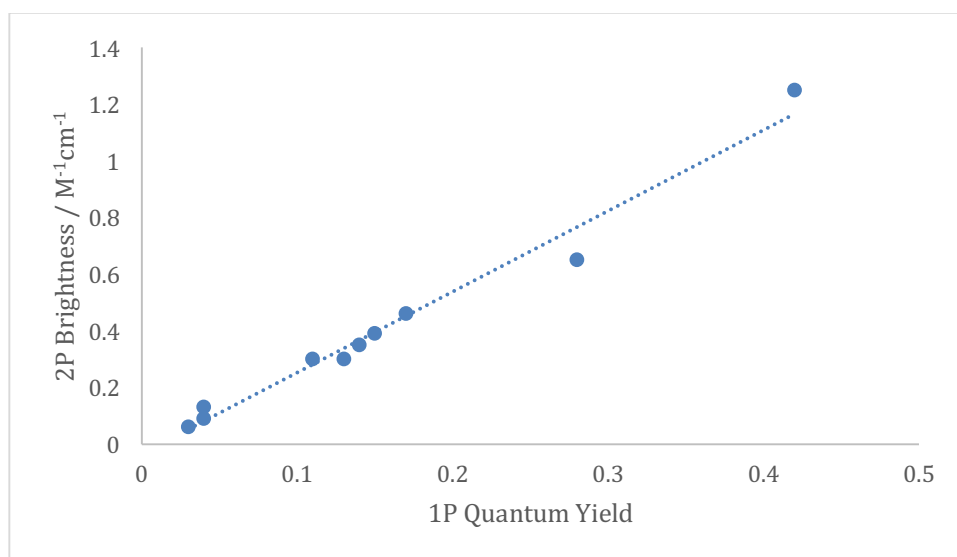

**Figure S10.** Correlation between 2P brightness and quantum yield measured under 1P excitation, for all pA-containing oligonucleotides, both single and double strands.

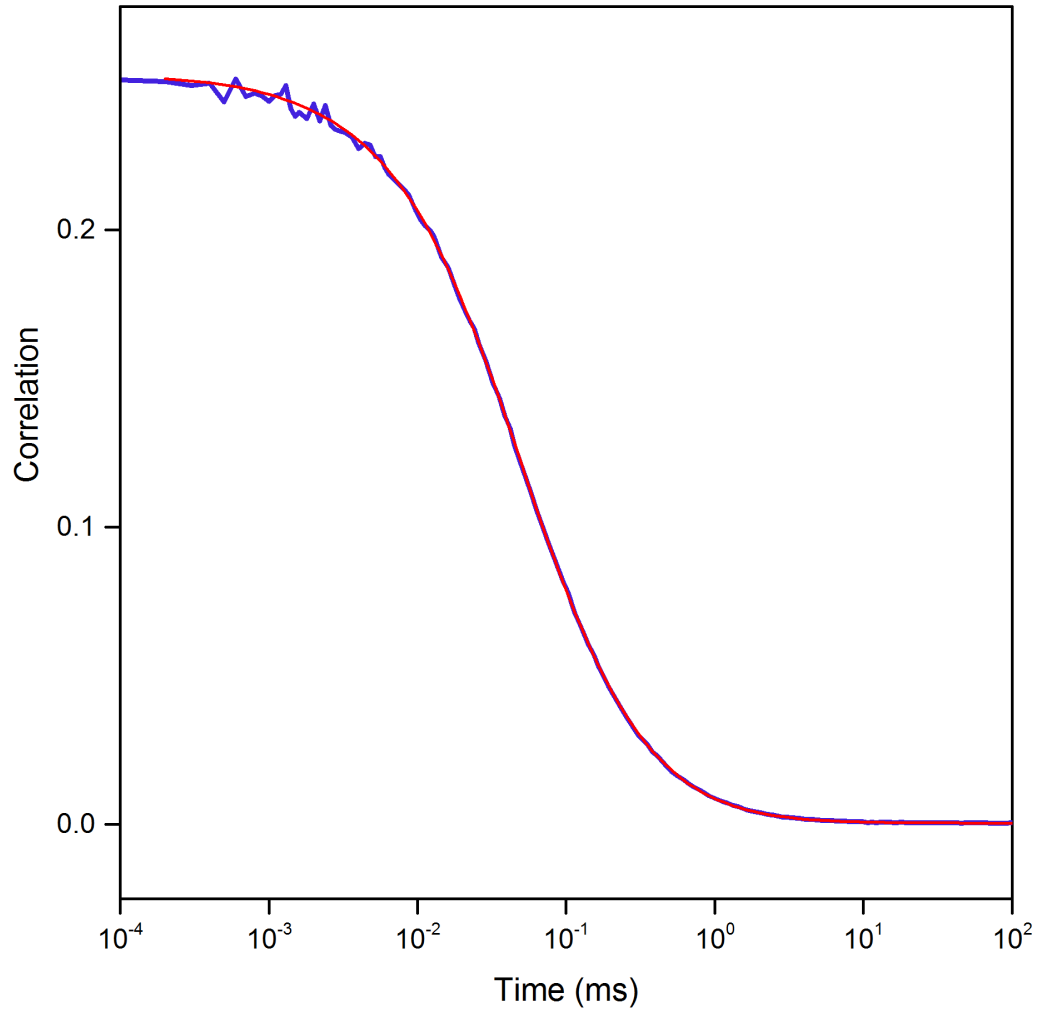

**Figure S11.** Two-photon FCS measurement (blue line) of rhodamine 110 in water (40 nM). The laser power (transform-limited pulses using the full laser spectrum; see Fig. 9) was 9.4 mW. The red line depicts the fit to the data. Fit parameters:  $N = 2.79$ ,  $\omega_0/z_0 = 4.4$ ,  $I_B = 0.6$  kHz,  $S = 130$  kHz,  $\tau_D = 49 \pm 5$   $\mu$ s.

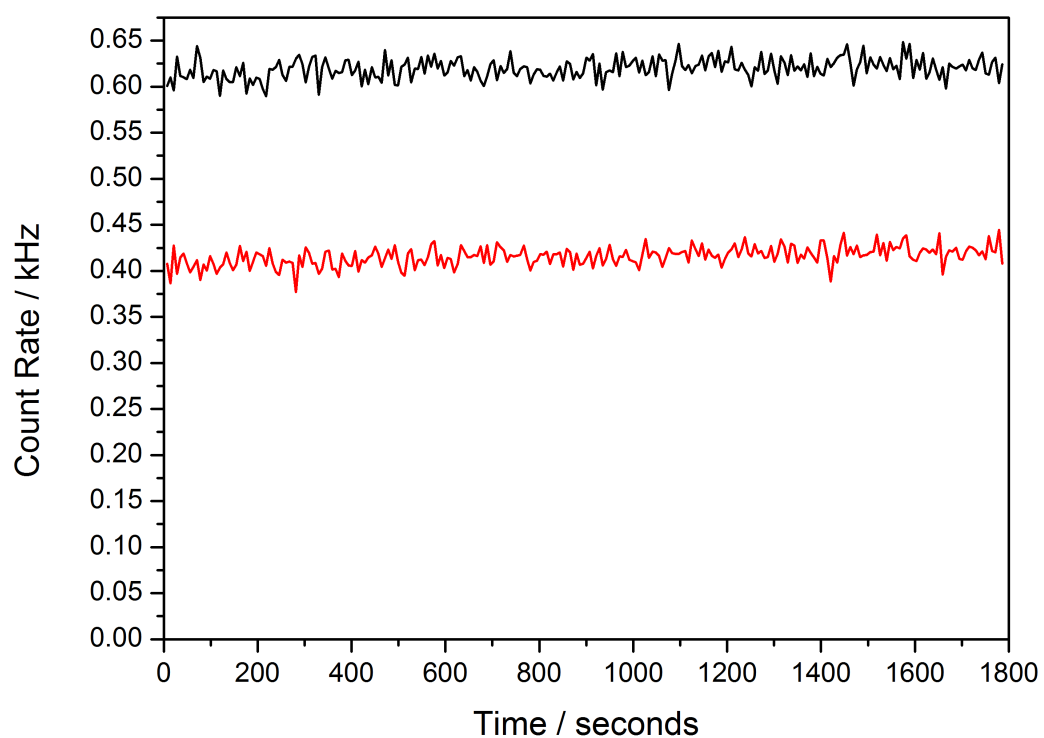

**Figure S12.** Fluorescence intensity vs. irradiation time for pA-containing GA single-strand oligonucleotide, under 2P microscopy conditions. The emission signal is split according to direction of polarization with respect to that of the laser; parallel in black and perpendicular in red. The signal is stable over 30 minutes. Excitation wavelength was 780 nm.

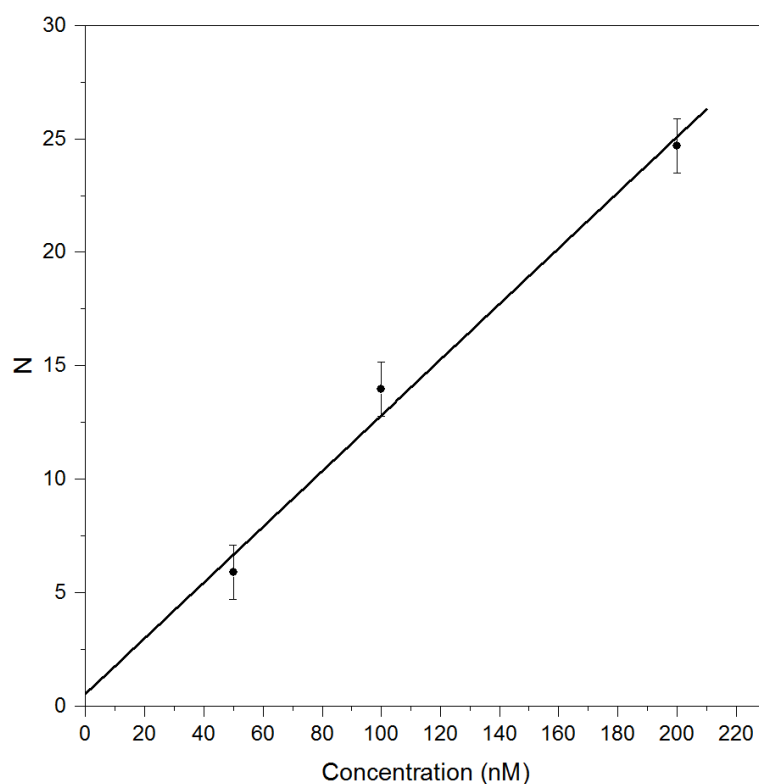

**Figure 13.** Concentration dependence of the number of molecules of pA-containing GA single-strand oligonucleotide in the excitation volume under 2P microscopy conditions. The number of molecules in the focus,  $N$ , was calculated according to equation 6 in the main text. The buffer solution was at 22 °C and the laser power was 7.1 mW with 30 min integration time for each data point. The error bars are estimated, and correspond to those measured previously at a sample concentration of 54 nM (see main text).

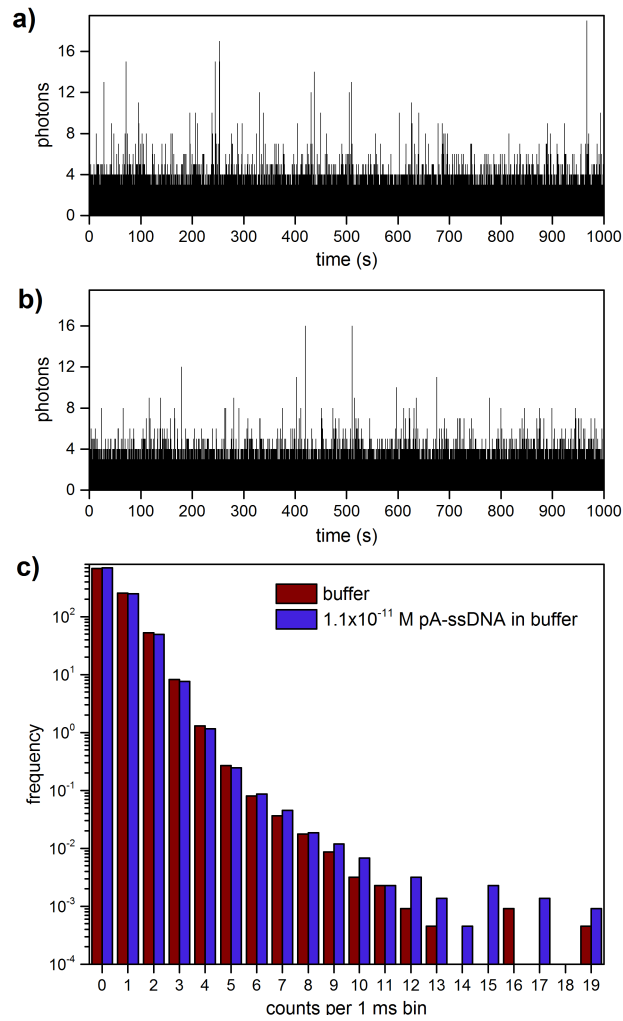

**Figure S14.** Confocal MCS trace for (a) pA-containing GA single strand oligonucleotide ( $1.1 \times 10^{-11}$  M in buffer) and (b) pure buffer; (c) the corresponding photon counting histogram for a 30 minute measurement. The measurement was recorded with a laser power of 10.7 mW and the optimal pulse shape (see main text for details).

## SUPPLEMENTARY TABLES

**Table S1.** Fluorescence decay parameters, fractional contributions to steady-state intensity ( $SS_i$ ) and average lifetime ( $\langle\tau\rangle$ ) for pA in phosphate buffer (pH 7.5) and ethanol, excited by 1P-absorption at 390 nm. A-factors ( $A_i$ ) are shown for an emission wavelength of 430 nm. (Global  $\chi^2$  values were 1.07 for pA in PBS and 1.09 in ethanol. Errors in values of lifetimes and A factors  $\leq 5\%$ ).

| Solvent | $\tau_1$ / ns | $\tau_2$ / ns | $A_1$ | $A_2$ | $SS_1$ | $SS_2$ | $\langle\tau\rangle$ / ns |
|---------|---------------|---------------|-------|-------|--------|--------|---------------------------|
| PBS     | 0.19          | 5.97          | 0.35  | 0.65  | 0.02   | 0.98   | 3.95                      |
| Ethanol | 0.16          | 4.82          | 0.21  | 0.79  | 0.01   | 0.99   | 3.84                      |

**Table S2.** A-factors and average lifetimes, as a function of emission wavelength, for pA riboside in ethanol, excited by 1P-absorption at 390 nm Globally fitted lifetimes:  $\tau_1 = 0.16$  ns and  $\tau_2 = 4.82$  ns.

| $\lambda_{em}$ / nm | $A_1$ | $A_2$ | $\langle\tau\rangle$ / ns |
|---------------------|-------|-------|---------------------------|
| 430                 | 0.21  | 0.79  | 3.84                      |
| 450                 | 0.18  | 0.82  | 3.99                      |
| 470                 | 0.18  | 0.82  | 3.99                      |

**Table S3.** A-factors, fractional contributions to steady-state intensity ( $SS_i$ ) and average lifetimes ( $\langle\tau\rangle$ ), as a function of emission wavelength for pA riboside in ethanol, excited by 2P-absorption at 790 nm. Globally fitted lifetimes:  $\tau_1 = 0.10$  ns and  $\tau_2 = 4.87$  ns.

| $\lambda_{em}$ / nm | $A_1$ | $A_2$ | $SS_1$ | $SS_2$ | $\langle\tau\rangle$ / ns |
|---------------------|-------|-------|--------|--------|---------------------------|
| 415                 | 0.73  | 0.27  | 0.07   | 0.93   | 1.39                      |
| 425                 | 0.77  | 0.23  | 0.09   | 0.91   | 1.20                      |
| 435                 | 0.81  | 0.19  | 0.12   | 0.88   | 1.01                      |

**Table S4.** Two-photon cross-sections ( $\sigma_2$ ) and brightness ( $\sigma_2\phi$ ), and one-photon absorption coefficients ( $\epsilon_{390}$ ), quantum yields ( $\phi$ ) and brightness ( $\epsilon_{390}\phi$ ), for pA in single- and double-stranded oligonucleotides. One-photon data were reported previously.<sup>2</sup>

|    | Single Stranded                   |                                                           |        |                        |                                                                | Double Stranded                   |                                                          |        |                        |                                                               |
|----|-----------------------------------|-----------------------------------------------------------|--------|------------------------|----------------------------------------------------------------|-----------------------------------|----------------------------------------------------------|--------|------------------------|---------------------------------------------------------------|
|    | $\sigma_2$ /<br>GM<br>(780<br>nm) | $\epsilon_{390}$<br>/ M <sup>-1</sup><br>cm <sup>-1</sup> | $\phi$ | $\sigma_2\phi$ /<br>GM | $\phi \epsilon_{390}$<br>/ M <sup>-1</sup><br>cm <sup>-1</sup> | $\sigma_2$ /<br>GM<br>(780<br>nm) | $\epsilon_{390}$<br>/M <sup>-1</sup><br>cm <sup>-1</sup> | $\phi$ | $\sigma_2\phi$<br>/ GM | $\epsilon_{390}\phi$<br>/ M <sup>-1</sup><br>cm <sup>-1</sup> |
| GA | 3.0                               | 14990                                                     | 0.42   | 1.3                    | 6296                                                           | 2.4                               | 14000                                                    | 0.14   | 0.35                   | 1960                                                          |
| GG | 2.3                               | 14340                                                     | 0.28   | 0.65                   | 4015                                                           | 2.4                               | 13190                                                    | 0.13   | 0.30                   | 1715                                                          |
| AT | 2.6                               | 14970                                                     | 0.15   | 0.39                   | 2246                                                           | 2.7                               | 14520                                                    | 0.17   | 0.46                   | 2468                                                          |
| CC | 2.5                               | 14520                                                     | 0.04   | 0.09                   | 523                                                            | 3.0                               | 12850                                                    | 0.04   | 0.13                   | 514                                                           |
| TT | 2.5                               | 14110                                                     | 0.03   | 0.06                   | 423                                                            | 2.7                               | 13560                                                    | 0.11   | 0.30                   | 1492                                                          |

## REFERENCES

1. S. de Reguardati, J. Pahapill, A. Mikhailov, Y. Stepanenko and A. Rebane, *Opt. Express*, 2016, **24**, 9053-9066.
2. M. Bood, A. F. Fuchtbauer, M. S. Wranne, J. J. Ro, S. Sarangamath, A. H. El-Sagheer, D. L. M. Rupert, R. S. Fisher, S. W. Magennis, A. C. Jones, F. Höök, B. T., B. H. Kim, A. Dahlén, L. M. Wilhelmsson and M. Grøtli, *Chem. Sci.*, 2018, **9**, 3494-3502.
